# Supplementary material for: GZ17-6.02 and Pemetrexed Interact to Kill Osimertinib-Resistant NSCLC Cells That Express Mutant ERBB1 Proteins
Source: PubMed Central journal article supplement (PMC8417372; doi:10.3389/fonc.2021.711043), 2021-08-19

| Vehicle<br>100%         | 1975<br>WT | 602  | OSI  | 6+O  | 1975<br>AR | 602  | OSI  | 6+O  | 1650<br>WT | 602  | OSI  | 6+O  |
|-------------------------|------------|------|------|------|------------|------|------|------|------------|------|------|------|
| P-ATM<br>S1980          |            | 112  | 100  | 119# |            | 112  | 101  | 116# |            | 116# | 98   | 118# |
| P-AMPK $\alpha$<br>T172 |            | 108  | 101  | 114# |            | 108  | 102  | 115# |            | 119# | 98   | 120# |
| P-mTOR<br>S2448         |            | 74*  | 68*  | 56*  |            | 69*  | 66*  | 60*  |            | 85*  | 96   | 83*  |
| P-mTOR<br>S2481         |            | 69*  | 68*  | 60*  |            | 68*  | 71*  | 60*  |            | 77*  | 87*  | 76*  |
| P-ULK1<br>S757          |            | 68*  | 63*  | 58*  |            | 63*  | 65*  | 53** |            | 77*  | 81*  | 71*  |
| P-ULK1<br>S317          |            | 108  | 105  | 113# |            | 106  | 99   | 118# |            | 109  | 107  | 114# |
| P-PERK<br>T980          |            | 118# | 109  | 120# |            | 117# | 111  | 124# |            | 114# | 104  | 114# |
| P-eIF2 $\alpha$<br>S51  |            | 115# | 109  | 116# |            | 116# | 105  | 121# |            | 117# | 114  | 122# |
| P-MEK1/2                |            | 93   | 83*  | 76*  |            | 93   | 82*  | 76*  |            | 92   | 97   | 87*  |
| P-AKT<br>T308           |            | 91   | 81*  | 70*  |            | 94   | 86*  | 80*  |            | 95   | 90   | 85*  |
| P-STAT3<br>Y705         |            | 93   | 92   | 85*  |            | 92   | 92   | 81*  |            | 96   | 95   | 94   |
| P-STAT5<br>Y694         |            | 89   | 88   | 82*  |            | 93   | 95   | 92   |            | 95   | 98   | 93   |
| Beclin1                 |            | 110  | 113# | 116# |            | 106  | 109  | 115# |            | 111  | 103  | 115# |
| ATG5                    |            | 109  | 111  | 117# |            | 107  | 105  | 113# |            | 116# | 106  | 117# |
| P-ATG13<br>S318         |            | 124# | 126# | 129# |            | 118# | 121# | 126# |            | 123# | 115# | 129# |
| GRP78                   |            | 121# | 119# | 121# |            | 115# | 103# | 116# |            | 120# | 111  | 122# |
| CHOP                    |            | 114# | 109  | 115# |            | 110  | 102  | 113# |            | 111  | 106  | 116# |
| PP1                     |            | 116# | 104  | 120# |            | 119# | 112  | 125# |            | 119# | 103  | 122# |
| NOXA                    |            | 106  | 100  | 107  |            | 104  | 100  | 106  |            | 111  | 101  | 113# |
| PUMA                    |            | 109  | 99   | 109  |            | 105  | 98   | 107  |            | 109  | 100  | 113# |
| FLIP-s                  |            | 92   | 85*  | 84*  |            | 90   | 79*  | 75*  |            | 93   | 102  | 90   |
| ERBB1                   |            | 95   | 99   | 92   |            | 100  | 100  | 105  |            | 100  | 98   | 96   |
| P-B1                    |            | 94   | 73*  | 71*  |            | 93   | 76*  | 73*  |            | 71*  | 61*  | 58*  |
| ERBB2                   |            | 98   | 100  | 98   |            | 101  | 102  | 92   |            | 95   | 94   | 91   |
| P-B2                    |            | 91   | 101  | 91   |            | 93   | 101  | 91   |            | 74*  | 97   | 68*  |
| ERBB3                   |            | 97   | 101  | 100  |            | 101  | 101  | 101  |            | 100  | 100  | 100  |
| P-B3                    |            | 95   | 100  | 90   |            | 97   | 100  | 94   |            | 81*  | 96   | 76*  |
| ERBB4                   |            | 101  | 99   | 99   |            | 100  | 98   | 98   |            | 99   | 100  | 100  |
| P-B4                    |            | 94   | 102  | 93   |            | 100  | 97   | 94   |            | 75*  | 96   | 73*  |
| p70 S6K<br>T389         |            | 89   | 92   | 86*  |            | 102  | 99   | 91   |            | 87*  | 99   | 85*  |
| Total<br>ERK2           |            | 100  | 99   | 99   |            | 100  | 100  | 101  |            | 100  | 100  | 101  |

**Supplemental Table 1. The impact of GZ17-6.02 and osimertinib on cell signaling in NSCLC cells (part 1).** Cells were treated with vehicle control, GZ17-6.02 (2  $\mu$ M final curcumin), osimertinib (100 nM) or the drugs combined for 6h. Cells were fixed in place and immunostaining performed to determine protein expression and phosphorylation (n = 3 +/-SD) \* p < 0.05 less than vehicle; # p < 0.05 greater than vehicle.

| Vehicle 100% | 1975 WT | 602  | OSI  | 6+O  | 1975 AR | 602  | OSI  | 6+O  | 1650 WT | 602  | OSI | 6+O  |
|--------------|---------|------|------|------|---------|------|------|------|---------|------|-----|------|
| P-NFκB S536  |         | 89   | 100  | 86*  |         | 83*  | 102  | 82*  |         | 88   | 83* | 80*  |
| P-SRC Y416   |         | 83*  | 95   | 81*  |         | 86*  | 95   | 76*  |         | 86*  | 83* | 80*  |
| P-SRC Y527   |         | 105  | 102  | 107  |         | 107  | 103  | 109  |         | 107  | 105 | 107  |
| c-MET        |         | 100  | 101  | 101  |         | 102  | 103  | 103  |         | 100  | 98  | 99   |
| P-c-MET      |         | 88   | 92   | 87*  |         | 89   | 93   | 85*  |         | 92   | 94  | 87*  |
| c-KIT        |         | 98   | 98   | 98   |         | 102  | 102  | 102  |         | 93   | 100 | 93   |
| P-c-KIT      |         | 91   | 99   | 91   |         | 98   | 109  | 118# |         | 85*  | 92  | 79*  |
| PDGFRβ       |         | 100  | 100  | 91   |         | 98   | 98   | 98   |         | 103  | 106 | 103  |
| P-PDGFRβ     |         | 89   | 89   | 86*  |         | 90   | 90   | 87*  |         | 83*  | 93  | 74*  |
| P-JAK2       |         | 86*  | 83*  | 83*  |         | 81*  | 86*  | 81*  |         | 83*  | 86* | 75*  |
| ERK2         |         | 99   | 99   | 99   |         | 100  | 101  | 100  |         | 99   | 100 | 100  |
| P-ERK1/2     |         | 87*  | 70*  | 61*¶ |         | 84*  | 85*  | 77*  |         | 87*  | 82* | 76*  |
| JNK1/2       |         | 100  | 101  | 99   |         | 100  | 100  | 100  |         | 100  | 104 | 100  |
| P-JNK1/2     |         | 87   | 89   | 85*  |         | 89   | 89   | 82*  |         | 86*  | 91  | 85*  |
| CD95         |         | 100  | 102  | 100  |         | 106  | 104  | 105  |         | 99   | 100 | 99   |
| FAS-L        |         | 102  | 101  | 110  |         | 101  | 100  | 99   |         | 107  | 104 | 111  |
| HDAC1        |         | 97   | 97   | 86*  |         | 101  | 101  | 100  |         | 98   | 99  | 97   |
| HDAC2        |         | 79*  | 99   | 68** |         | 73*  | 98   | 71*  |         | 75*  | 98  | 68*  |
| HDAC3        |         | 79*  | 96   | 69*  |         | 77*  | 96   | 65** |         | 84*  | 98  | 78*  |
| HDAC4        |         | 88   | 93   | 80*  |         | 87   | 103  | 81*  |         | 85*  | 101 | 84*  |
| HDAC5        |         | 97   | 100  | 94   |         | 93   | 100  | 93   |         | 92   | 99  | 87*  |
| HDAC6        |         | 80*  | 105  | 69** |         | 75*  | 103  | 60** |         | 76*  | 98  | 74*  |
| HDAC7        |         | 87   | 103  | 83*  |         | 88   | 100  | 79*  |         | 83*  | 99  | 83*  |
| HDAC8        |         | 96   | 99   | 92   |         | 96   | 100  | 95   |         | 97   | 101 | 94   |
| HDAC9        |         | 100  | 98   | 97   |         | 95   | 100  | 89   |         | 102  | 100 | 100  |
| HDAC10       |         | 96   | 99   | 89   |         | 97   | 97   | 100  |         | 100  | 98  | 97   |
| HDAC11       |         | 97   | 96   | 93   |         | 102  | 98   | 95   |         | 93   | 100 | 89   |
| PD-L1        |         | 84*  | 99   | 74*  |         | 82*  | 99   | 74*  |         | 86*  | 97  | 80*  |
| PD-L2        |         | 98   | 97   | 96   |         | 98   | 98   | 100  |         | 95   | 97  | 91   |
| MHCA         |         | 114# | 96   | 118# |         | 120# | 99   | 119# |         | 112  | 103 | 116# |
| ODC          |         | 90   | 100  | 89   |         | 90   | 101  | 90   |         | 95   | 104 | 93   |
| IDO1         |         | 89   | 99   | 85*  |         | 91   | 100  | 86*  |         | 92   | 100 | 87*  |
| β-catenin    |         | 102  | 98   | 95   |         | 102  | 99   | 96   |         | 100  | 101 | 100  |
| P-β-catenin  |         | 112  | 111  | 114* |         | 111  | 109  | 114* |         | 103  | 102 | 103  |
| YAP          |         | 99   | 99   | 100  |         | 98   | 99   | 100  |         | 99   | 98  | 97   |
| P-YAP S127   |         | 112  | 113# | 116# |         | 124# | 124# | 126# |         | 116# | 102 | 117# |
| TAZ          |         | 104  | 100  | 100  |         | 102  | 102  | 100  |         | 100  | 101 | 98   |
| P-TAZ S89    |         | 112  | 114# | 115# |         | 119# | 122# | 124# |         | 113# | 101 | 116# |

**Supplemental Table 2. The impact of GZ17-6.02 and osimertinib on cell signaling in NSCLC cells (part 2).** Cells were treated with vehicle control, GZ17-6.02 (2 μM final curcumin), osimertinib (100 nM) or the drugs combined for 6h. Cells were fixed in place and immunostaining performed to determine protein expression and phosphorylation (n = 3 +/-SD) \* p < 0.05 less than vehicle; \*\* p < 0.05 less than GZ17-6.02 alone; # p < 0.05 greater than vehicle.

| Vehicle 100%         | 1975 WT | 602  | PEM | 6+P  | 1975 AR | 602  | PEM | 6+P  | 1975 OR | 602  | PEM  | 6+P  |
|----------------------|---------|------|-----|------|---------|------|-----|------|---------|------|------|------|
| P-ATM S1980          |         | 113# | 108 | 117# |         | 113# | 108 | 116# |         | 114# | 109  | 118# |
| P-AMPK $\alpha$ T172 |         | 112  | 105 | 114# |         | 111  | 107 | 117# |         | 117# | 112  | 118# |
| P-mTOR S2448         |         | 86*  | 96  | 85*  |         | 84*  | 95  | 82*  |         | 88   | 94   | 81*  |
| P-mTOR S2481         |         | 78*  | 91  | 75*  |         | 81*  | 83* | 78*  |         | 79*  | 92   | 75*  |
| P-ULK1 S757          |         | 85*  | 91  | 82*  |         | 89   | 95  | 82*  |         | 89   | 96   | 82*  |
| P-ULK1 S317          |         | 108  | 105 | 114# |         | 110  | 105 | 115# |         | 112  | 103  | 120# |
| P-PERK T980          |         | 112  | 103 | 116# |         | 114* | 102 | 118# |         | 118# | 101  | 122# |
| P-eIF2 $\alpha$ S51  |         | 112  | 103 | 118# |         | 111  | 103 | 115# |         | 110  | 101  | 117# |
| P-AKT T308           |         | 84*  | 87* | 79*  |         | 87*  | 88  | 84*  |         | 83*  | 87*  | 79*  |
| P-STAT3 Y705         |         | 86*  | 88  | 86*  |         | 92   | 95  | 82*  |         | 82*  | 88   | 80*  |
| P-STAT5 Y694         |         | 89   | 91  | 85*  |         | 93   | 94  | 85*  |         | 82*  | 87*  | 80*  |
| Beclin1              |         | 115# | 112 | 117# |         | 112  | 111 | 118# |         | 115# | 111  | 120# |
| ATG5                 |         | 115# | 109 | 117# |         | 112  | 107 | 117# |         | 115# | 110  | 119# |
| P-ATG13 S318         |         | 112  | 104 | 117# |         | 114# | 105 | 118# |         | 115# | 106  | 120# |
| GRP78                |         | 124# | 112 | 130# |         | 120# | 109 | 126# |         | 127# | 115# | 132# |
| CHOP                 |         | 115# | 107 | 117# |         | 112  | 104 | 116# |         | 114# | 107  | 119# |
| PP1                  |         | 111  | 109 | 113# |         | 108  | 104 | 110  |         | 109  | 105  | 111  |
| ERBB1                |         | 100  | 101 | 98   |         | 100  | 101 | 100  |         | 100  | 99   | 100  |
| P-B1                 |         | 85*  | 88  | 75*  |         | 87*  | 93  | 78*  |         | 94   | 88   | 84*  |
| ERBB2                |         | 100  | 101 | 101  |         | 100  | 100 | 100  |         | 99   | 100  | 100  |
| P-B2                 |         | 88   | 96  | 75*  |         | 86*  | 97  | 73*  |         | 88   | 92   | 85*  |
| ERBB3                |         | 99   | 99  | 99   |         | 99   | 99  | 100  |         | 100  | 101  | 100  |
| P-B3                 |         | 89   | 95  | 85*  |         | 91   | 97  | 80*  |         | 90   | 93   | 86*  |
| ERBB4                |         | 100  | 100 | 100  |         | 100  | 100 | 101  |         | 100  | 100  | 100  |
| P-B4                 |         | 100  | 100 | 100  |         | 86*  | 96  | 83*  |         | 86*  | 95   | 76*  |
| p70 S6K              |         | 100  | 101 | 102  |         | 100  | 100 | 100  |         | 100  | 101  | 100  |
| p70 S6K T389         |         | 91   | 99  | 81*  |         | 89   | 97  | 76*  |         | 89   | 98   | 78*  |
| P-NF $\kappa$ B S536 |         | 87*  | 85* | 83*  |         | 88   | 98  | 87*  |         | 83*  | 92   | 80*  |
| P-SRC Y416           |         | 95   | 94  | 94   |         | 86*  | 92  | 85*  |         | 92   | 90   | 86*  |
| P-SRC Y527           |         | 105  | 109 | 108  |         | 107  | 109 | 113# |         | 107  | 112  | 113# |
| c-MET                |         | 100  | 100 | 100  |         | 103  | 100 | 102  |         | 99   | 100  | 101  |
| P-c-MET              |         | 94   | 94  | 90   |         | 93   | 102 | 93   |         | 84*  | 88   | 82*  |
| c-KIT                |         | 99   | 99  | 100  |         | 100  | 101 | 100  |         | 100  | 101  | 102  |
| P-c-KIT              |         | 85*  | 94  | 83*  |         | 89   | 88  | 82*  |         | 89   | 90   | 81*  |
| PDGFR $\beta$        |         | 101  | 100 | 100  |         | 98   | 100 | 100  |         | 99   | 100  | 100  |
| P-PDGFR $\beta$      |         | 85*  | 90  | 82*  |         | 82*  | 84* | 80*  |         | 81*  | 98   | 79*  |
| JAK2                 |         | 101  | 102 | 101  |         | 99   | 100 | 100  |         | 98   | 98   | 99   |
| P-JAK2               |         | 94   | 91  | 89   |         | 93   | 87* | 87*  |         | 95   | 89   | 89   |
| ERK2                 |         | 100  | 99  | 100  |         | 98   | 99  | 99   |         | 100  | 100  | 101  |
| P-ERK1/2             |         | 86*  | 95  | 85*  |         | 78*  | 98  | 78*  |         | 83*  | 96   | 80*  |
| CD95                 |         | 97   | 100 | 100  |         | 101  | 101 | 100  |         | 101  | 100  | 100  |
| FAS-L                |         | 104  | 108 | 113# |         | 103  | 108 | 113# |         | 105  | 110  | 116# |

**Supplemental Table 3. The impact of GZ17-6.02 and pemetrexed on cell signaling in NSCLC cells.** Cells were treated with vehicle control, GZ17-6.02 (2  $\mu$ M final curcumin), pemetrexed (500 nM) or the drugs combined for 6h. Cells were fixed in place and immunostaining performed to determine protein expression and phosphorylation (n = 3 +/-SD) \* p < 0.05 less than vehicle; # p < 0.05 greater than vehicle.

|                 | VEH | 602 | PEM | 6+P |
|-----------------|-----|-----|-----|-----|
| <b>H1975 WT</b> |     |     |     |     |
| FLIP-s          | 100 | 97  | 101 | 93  |
| BCL-XL          | 100 | 90  | 87* | 81* |
| MCL-1           | 100 | 85* | 81* | 80* |
| ERK2            | 100 | 100 | 100 | 100 |
|                 |     |     |     |     |
| <b>H1975 OR</b> |     |     |     |     |
| FLIP-s          | 100 | 99  | 98  | 98  |
| BCL-XL          | 100 | 93  | 90  | 85* |
| MCL-1           | 100 | 89* | 84* | 82* |
| ERK2            | 100 | 101 | 101 | 101 |
|                 |     |     |     |     |
| <b>H1650 WT</b> |     |     |     |     |
| FLIP-s          | 100 | 91  | 92  | 88  |
| BCL-XL          | 100 | 87* | 84* | 83* |
| MCL-1           | 100 | 86* | 83* | 80* |
| ERK2            | 100 | 100 | 100 | 101 |
|                 |     |     |     |     |
| <b>H1650 OR</b> |     |     |     |     |
| FLIP-s          | 100 | 97  | 93  | 91  |
| BCL-XL          | 100 | 87* | 85* | 83* |
| MCL-1           | 100 | 90  | 86* | 83* |
| ERK2            | 100 | 101 | 100 | 100 |

**Supplemental Table 4. The impact of GZ17-6.02 and pemetrexed on the expression of cytoprotective proteins in NSCLC cells.** Cells were treated with vehicle control, GZ17-6.02 (2  $\mu$ M final curcumin), pemetrexed (500 nM) or the drugs combined for 6h. Cells were fixed in place and immunostaining performed to determine protein expression (n = 3 +/-SD) \* p < 0.05 less than vehicle.

| 1975WT | 602 | PEM | 6+P | 1975OR | 602 | PEM | 6+P |
|--------|-----|-----|-----|--------|-----|-----|-----|
| 1      | 94  | 99  | 86* |        | 96  | 97  | 97  |
| 2      | 92  | 93  | 86* |        | 90  | 93  | 84* |
| 3      | 91  | 100 | 84* |        | 93  | 98  | 85* |
| 4      | 100 | 100 | 101 |        | 97  | 100 | 98  |
| 5      | 99  | 98  | 94  |        | 94  | 95  | 90  |
| 6      | 82* | 88  | 81* |        | 84* | 93  | 83* |
| 7      | 94  | 98  | 94  |        | 95  | 98  | 97  |
| 8      | 100 | 101 | 102 |        | 100 | 101 | 100 |
| 9      | 101 | 99  | 100 |        | 96  | 97  | 96  |
| 10     | 102 | 102 | 98  |        | 100 | 100 | 102 |
| 11     | 101 | 101 | 101 |        | 98  | 101 | 100 |
| ERK2   | 100 | 100 | 100 |        | 102 | 101 | 102 |

**Supplemental Table 5. The impact of GZ17-6.02 and pemetrexed on the expression of histone deacetylase (HDAC) proteins in NSCLC cells.** Cells were treated with vehicle control, GZ17-6.02 (2  $\mu$ M final curcumin), pemetrexed (500 nM) or the drugs combined for 6h. Cells were fixed in place and immunostaining performed to determine protein expression (n = 3 +/-SD) \* p < 0.05 less than vehicle.

|       | A549 |      |      | H460 |     |      | H1437 |     |      | LLC  |     |      |
|-------|------|------|------|------|-----|------|-------|-----|------|------|-----|------|
|       | 602  | PEM  | 6+P  | 602  | PEM | 6+P  | 602   | PEM | 6+P  | 602  | PEM | 6+P  |
| PD-L1 | 64*  | 85*  | 65*  | 66*  | 87* | 69*  | 78*   | 85* | 72*  | 68*  | 90  | 65*  |
| PD-L2 | 89   | 102  | 99   | 97   | 104 | 93   | 97    | 102 | 97   | 95   | 102 | 94   |
| MHCA  | 126# | 111# | 126# | 125# | 112 | 128# | 125#  | 112 | 129# | 123# | 103 | 127# |
| IDO1  | 97   | 98   | 95   | 85*  | 95  | 86*  | 94    | 95  | 92   | 87   | 97  | 89   |
| ODC   | 90   | 98   | 87*  | 105  | 103 | 91   | 93    | 96  | 85*  | 95   | 92  | 91   |
| ERK2  | 100  | 99   | 99   | 102  | 100 | 102  | 99    | 99  | 99   | 100  | 98  | 99   |

|       | HCC827ER |      |       | H661 |      |      | H1573 |     |      | H1299 |     |      |
|-------|----------|------|-------|------|------|------|-------|-----|------|-------|-----|------|
|       | 602      | PEM  | 6+P   | 602  | PEM  | 6+P  | 602   | PEM | 6+P  | 602   | PEM | 6+P  |
| PD-L1 | 82*      | 84*  | 78*   | 69*  | 80*  | 66*  | 79*   | 89  | 75*  | 75*   | 84* | 72*  |
| PD-L2 | 100      | 100  | 102   | 98   | 102  | 99   | 98    | 104 | 98   | 98    | 100 | 98   |
| MHCA  | 130#     | 123# | 145## | 124# | 113# | 132# | 125#  | 111 | 125# | 124#  | 109 | 123# |
| IDO1  | 69*      | 78*  | 70*   | 75*  | 83*  | 74*  | 82*   | 92  | 84*  | 87*   | 95  | 86*  |
| ODC   | 86*      | 76*  | 75*   | 85*  | 84*  | 82*  | 98    | 87* | 75** | 100   | 99  | 93   |
| ERK2  | 99       | 100  | 100   | 101  | 100  | 100  | 101   | 102 | 101  | 100   | 100 | 100  |

|       | 1975WT |     |      | 1975AR |     |      | 1975OR |     |      | 1650WT |     |      | 1650OR |     |      |
|-------|--------|-----|------|--------|-----|------|--------|-----|------|--------|-----|------|--------|-----|------|
|       | 602    | PEM | 6+P  | 602    | PEM | 6+P  | 602    | PEM | 6+P  | 602    | PEM | 6+P  | 602    | PEM | 6+P  |
| PD-L1 | 72*    | 86* | 71*  | 84*    | 89  | 73** | 90     | 96  | 82*  | 74*    | 85* | 71*  | 86*    | 94  | 84*  |
| PD-L2 | 99     | 102 | 100  | 100    | 101 | 96   | 100    | 99  | 97   | 98     | 101 | 98   | 101    | 99  | 98   |
| MHCA  | 127#   | 110 | 125# | 128#   | 108 | 136# | 115#   | 112 | 122# | 124#   | 109 | 123# | 116#   | 107 | 118# |
| IDO1  | 84*    | 86* | 82*  | 80*    | 91  | 78*  | 91     | 93  | 83*  | 87*    | 88  | 86*  | 90     | 100 | 86*  |
| ODC   | 89     | 89  | 80*  | 81*    | 80* | 84*  | 89     | 93  | 82*  | 100    | 91  | 93   | 88     | 89  | 85*  |
| ERK2  | 100    | 100 | 101  | 100    | 100 | 99   | 101    | 100 | 100  | 100    | 99  | 100  | 99     | 101 | 100  |

**Supplemental Table 6. The impact of GZ17-6.02 and pemetrexed on the expression of immunoregulatory proteins in NSCLC cells.** Cells were treated with vehicle control, GZ17-6.02 (2  $\mu$ M final curcumin), pemetrexed (500 nM) or the drugs combined for 6h. Cells were fixed in place and immunostaining performed to determine protein expression (n = 3 +/-SD) \* p < 0.05 less than vehicle; # p < 0.05 greater than vehicle.

## **Figure Legends**

**Supplemental Figure 1. Representative control data showing siRNA protein expression knock down or protein over-expression.** Cells were transfected with plasmids to express the indicated proteins or with siRNA molecules to knock down protein expression. Twenty-four h after transfection cells were fixed in place. In cell immunostaining was performed to detect the levels of each protein and in parallel as a loading control, the total expression of invariant ERK2 (n = 3 +/-SD).

**Supplemental Figure 2. Resistance to ERBB1 inhibitors is associated with a reduced ability to**

**form autophagosomes. A.** H1975 (wild type sensitive and afatinib-resistant (AR)) were transfected to express LC3-GFP-RFP and subsequently treated with vehicle, osimertinib (100 nM), GZ17-6.02 (2  $\mu$ M curcumin final) or the drugs in combination for 4h and 8h. The number of intense staining GFP+ and RFP+ punctae were determined randomly in at least 50 cells and the mean number of punctae per cell determined (n = 3 +/-SD). # p < 0.05 greater than GZ17-6.02 value; ¶ p < 0.05 greater than corresponding value after 4h; ~ p < 0.05 less than corresponding value in wild type sensitive cells.

**B.** Erlotinib-resistant HCC827 cells were transfected with siRNA molecules to knock down protein levels or with plasmids to express activated forms of mTOR or STAT3 and then subsequently treated with vehicle or [osimertinib (100 nM) + GZ17-6.02 (2  $\mu$ M curcumin final)] in combination for 4h and 8h. The number of intense staining GFP+ and RFP+ punctae were determined randomly in at least 50 cells and the mean number of punctae per cell determined (n = 3 +/-SD). ¶ p < 0.05 greater than corresponding value after 4h; \* p < 0.05 less than corresponding values in siSCR/CMV transfected cells.

**C.** Afatinib-resistant H1975 cells were transfected with siRNA molecules to knock down protein levels or with plasmids to express activated forms of mTOR or STAT3 and then subsequently treated with vehicle or [osimertinib (100 nM) + GZ17-6.02 (2  $\mu$ M curcumin final)] in combination for 4h and 8h. The number of intense staining GFP+ and RFP+ punctae were determined randomly in at least 50 cells and the mean number of punctae per cell determined (n = 3 +/-SD). ¶ p < 0.05 greater than corresponding value after 4h; \* p < 0.05 less than corresponding values in siSCR/CMV transfected cells.



**Supplemental Figure 3. The killing of afatinib-resistant NSCLC cells requires [BAX + BAK] and autophagosome formation and is significantly reduced by expression of activated AKT, activated mTOR or activated MEK1.** Afatinib-resistant H1975 cells were transfected with siRNA molecules to knock down protein expression or with plasmids to express regulatory proteins. Subsequently, cells were treated with vehicle or [osimertinib (100 nM) + GZ17-6.02 (2  $\mu$ M curcumin final)] in combination for 24h. Cell viability was determined by trypan blue exclusion (n = 3 +/-SD). \* p < 0.05 less than corresponding siSCR/CMV value; ¶ p < 0.05 less than corresponding values in all other conditions; § p < 0.05 greater than corresponding values in all other manipulated conditions.

**Supplemental Figure 4. GZ17-6.02 weakly alters GSH levels and the GSH:GSSG ratio in NSCLC**

**cells.** Cells were treated with vehicle control or with GZ17-6.02 (2  $\mu$ M or 4  $\mu$ M curcumin final concentration). Cells were isolated 3h-48h afterwards and the total levels of GSH expressed as a percentage of vehicle control at each time point and the ratio of GSH to GSSG determined using a kit purchased from Promega. (n = 3 +/-SD) \* p < 0.05 less than vehicle control value.

**Supplemental Figure 5. In erlotinib-resistant HCC827 cells signaling by ATM enhances autophagosome formation whereas signaling from mTOR suppresses this event.** Erlotinib-resistant HCC827 were transfected with siRNA molecules to knock down protein levels or with plasmids to express activated forms of mTOR or STAT3 and then subsequently treated with vehicle or [pemetrexed (500 nM) + GZ17-6.02 (2  $\mu$ M curcumin final)] in combination for 4h and 8h. The number of intense staining GFP+ and RFP+ punctae were determined randomly in at least 50 cells and the mean number of punctae per cell determined (n = 3 +/-SD). ¶ p < 0.05 greater than corresponding value after 4h; \* p < 0.05 less than corresponding values in siSCR/CMV transfected cells; ∞ p < 0.05 less than values in siIF2 $\alpha$ , siAMPK $\alpha$  and caSTAT3.

Supplemental Figure 1

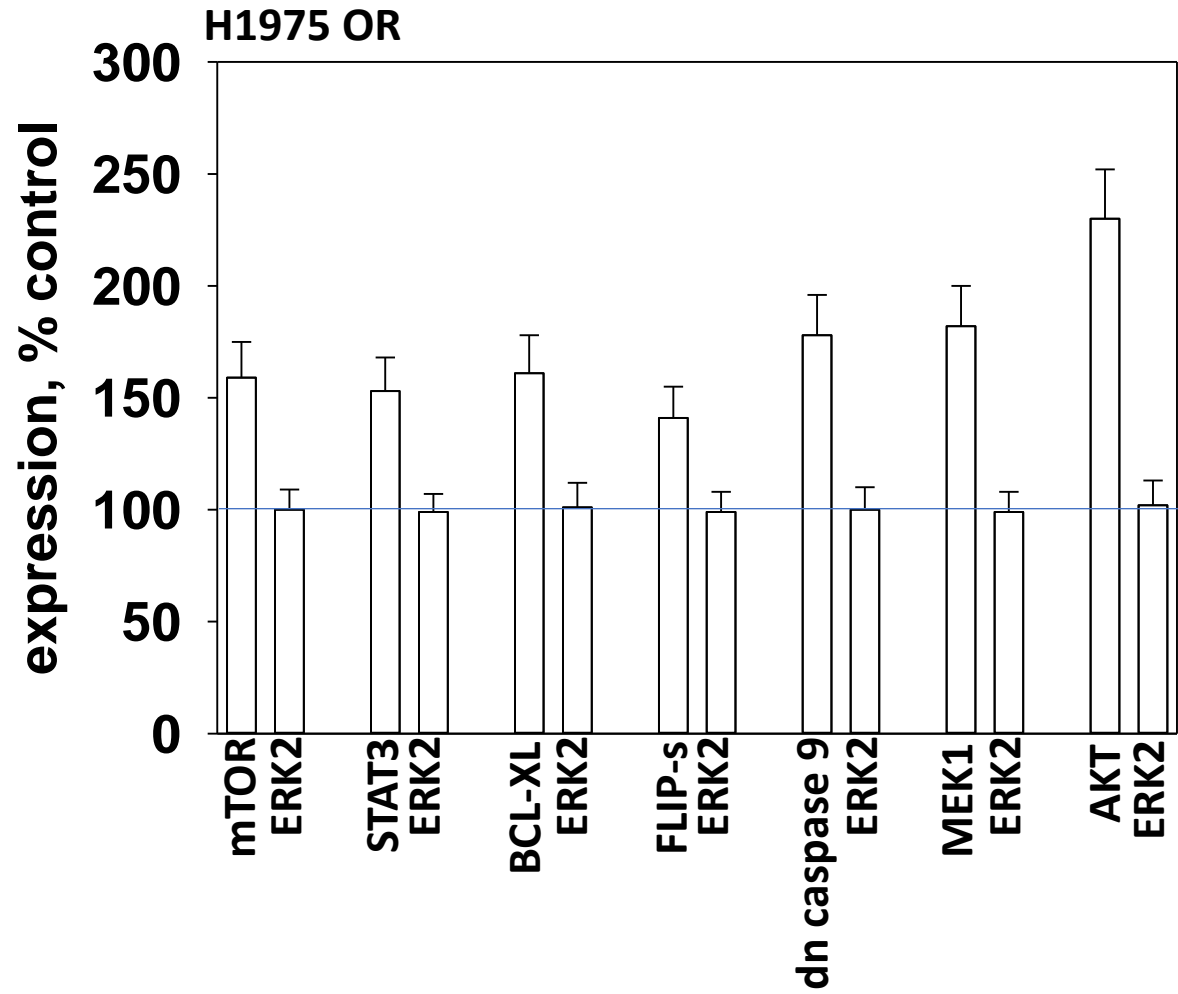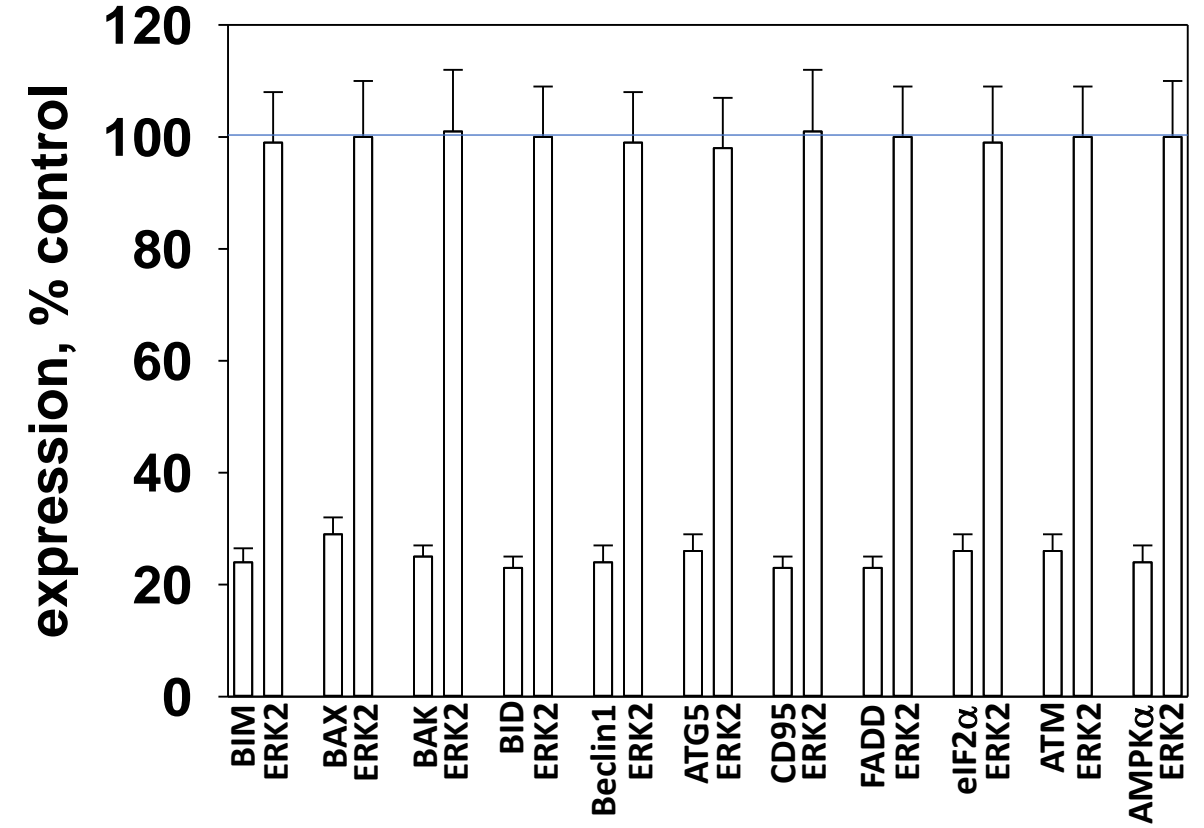

# Supplemental Figure 2

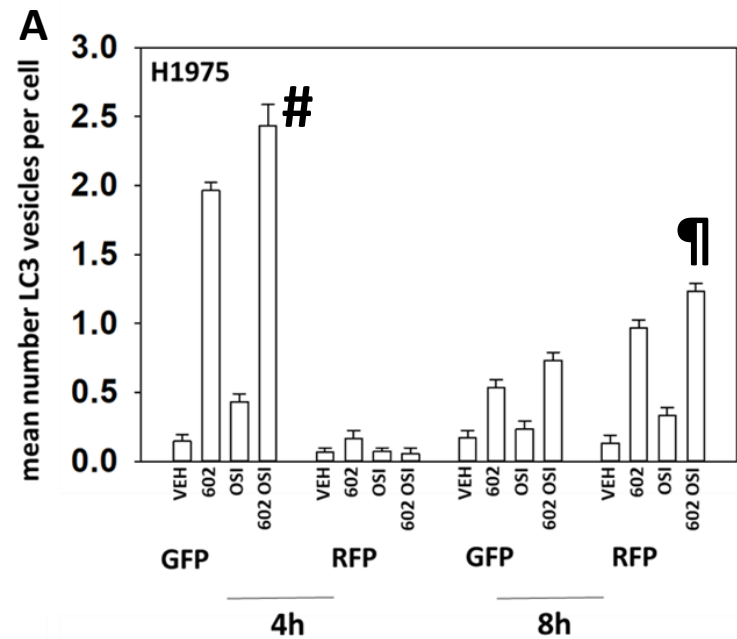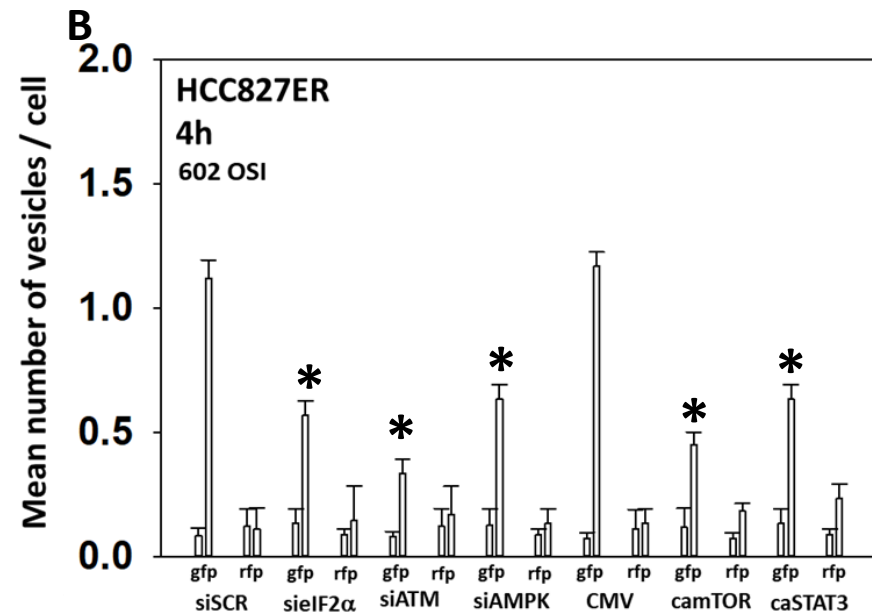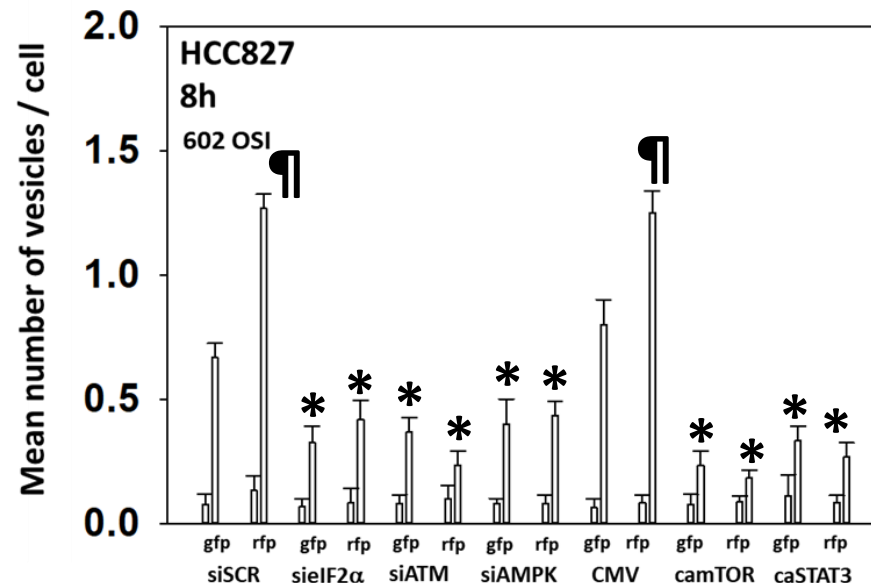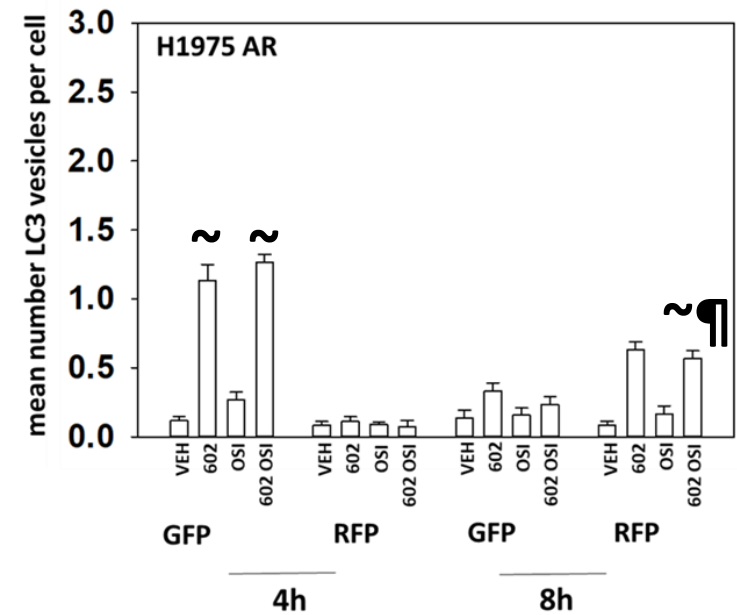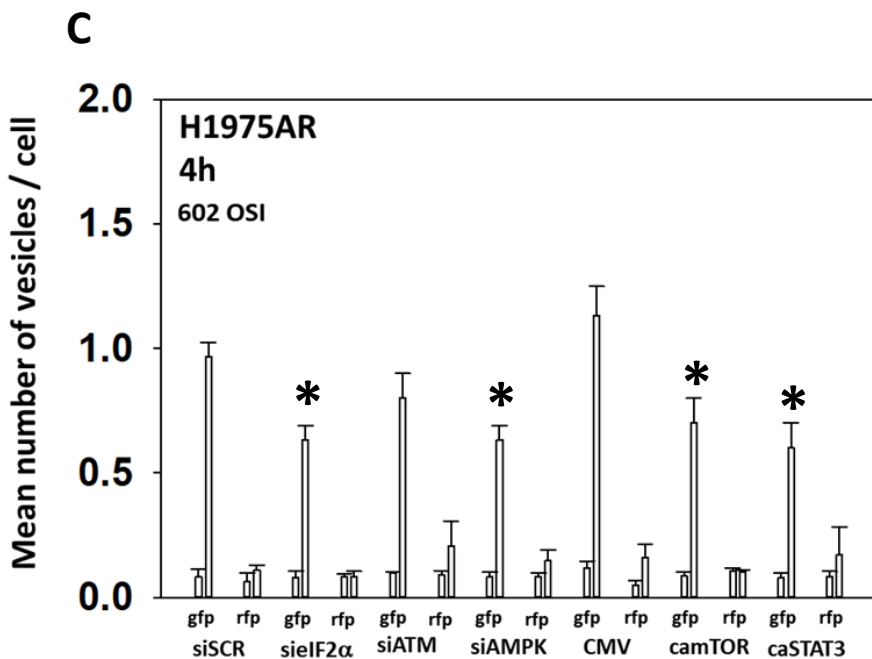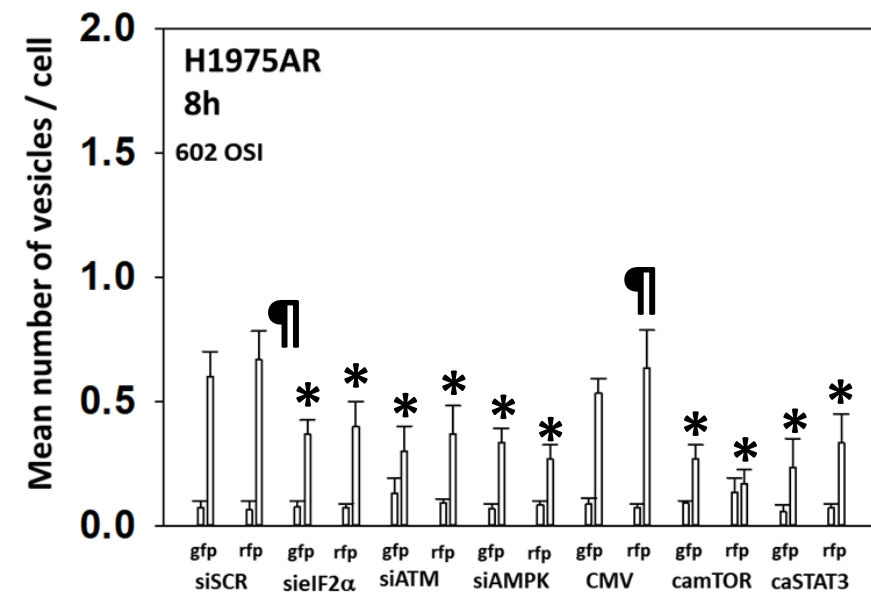

**Supplemental Figure 3**

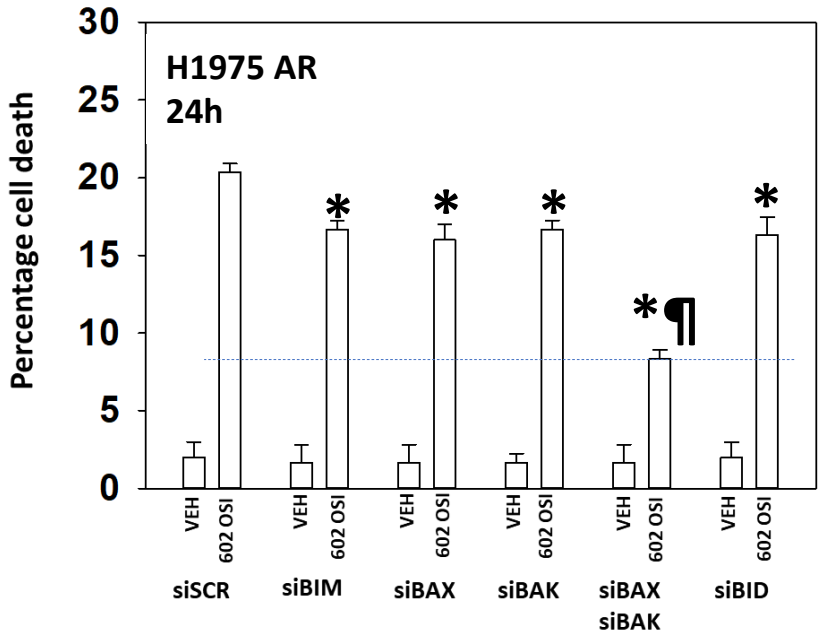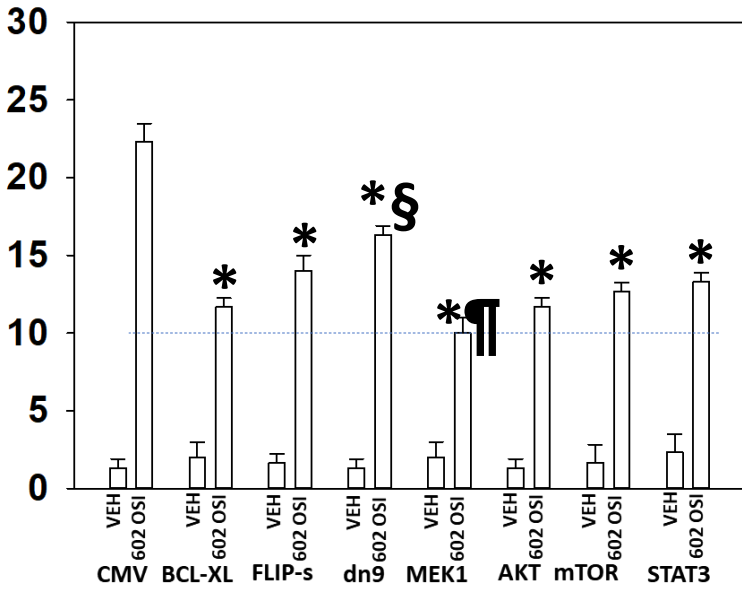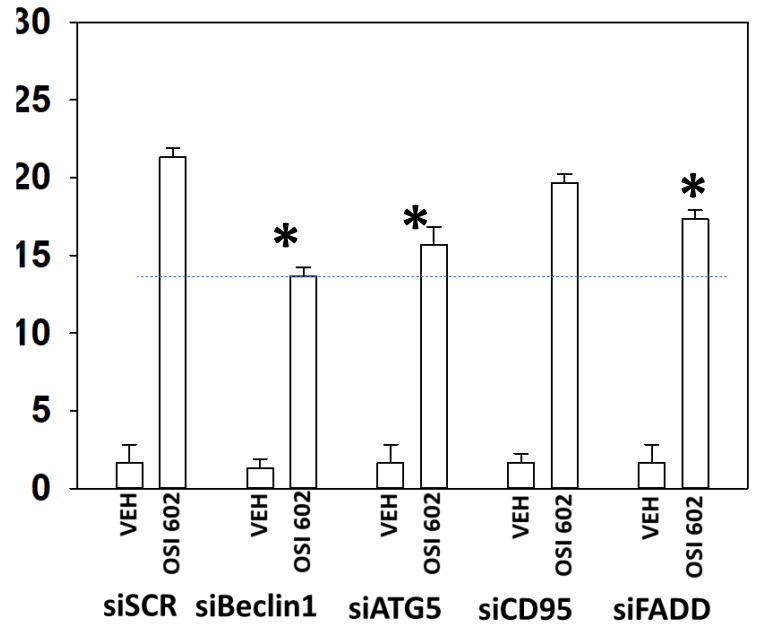

# Supplemental Figure 4

| GSH : GSSG | 2 $\mu$ M | 0.26 | 0.27 | 0.26 | 0.26 | 0.29 | 0.31 |
|------------|-----------|------|------|------|------|------|------|
|            | 4 $\mu$ M | 0.26 | 0.26 | 0.26 | 0.28 | 0.30 | 0.33 |
|            | VEH       | t=3  | t=6  | t=12 | t=24 | t=48 |      |

| GSH : GSSG | 2 $\mu$ M | 0.26 | 0.25 | 0.26 | 0.26 | 0.30 | 0.32 |
|------------|-----------|------|------|------|------|------|------|
|            | 4 $\mu$ M | 0.26 | 0.26 | 0.26 | 0.28 | 0.32 | 0.34 |
|            | VEH       | t=3  | t=6  | t=12 | t=24 | t=48 |      |

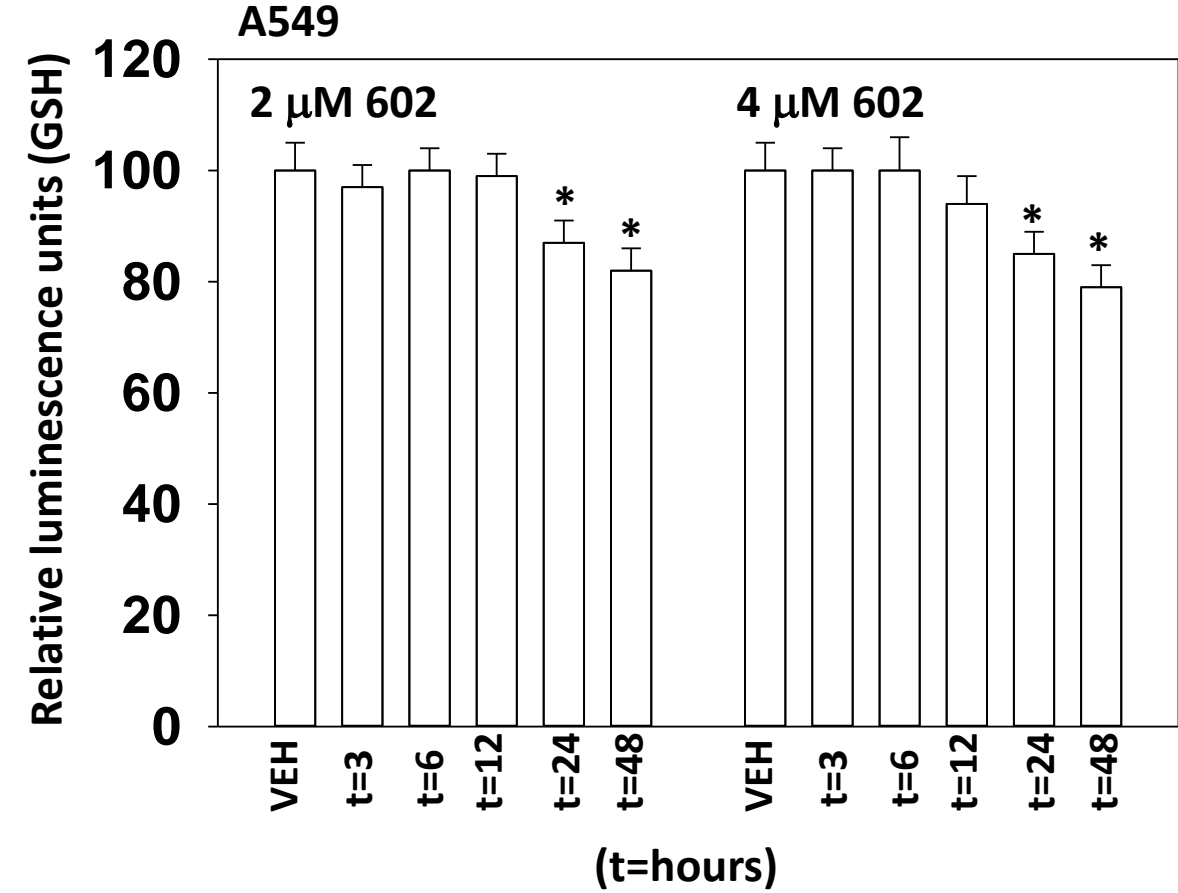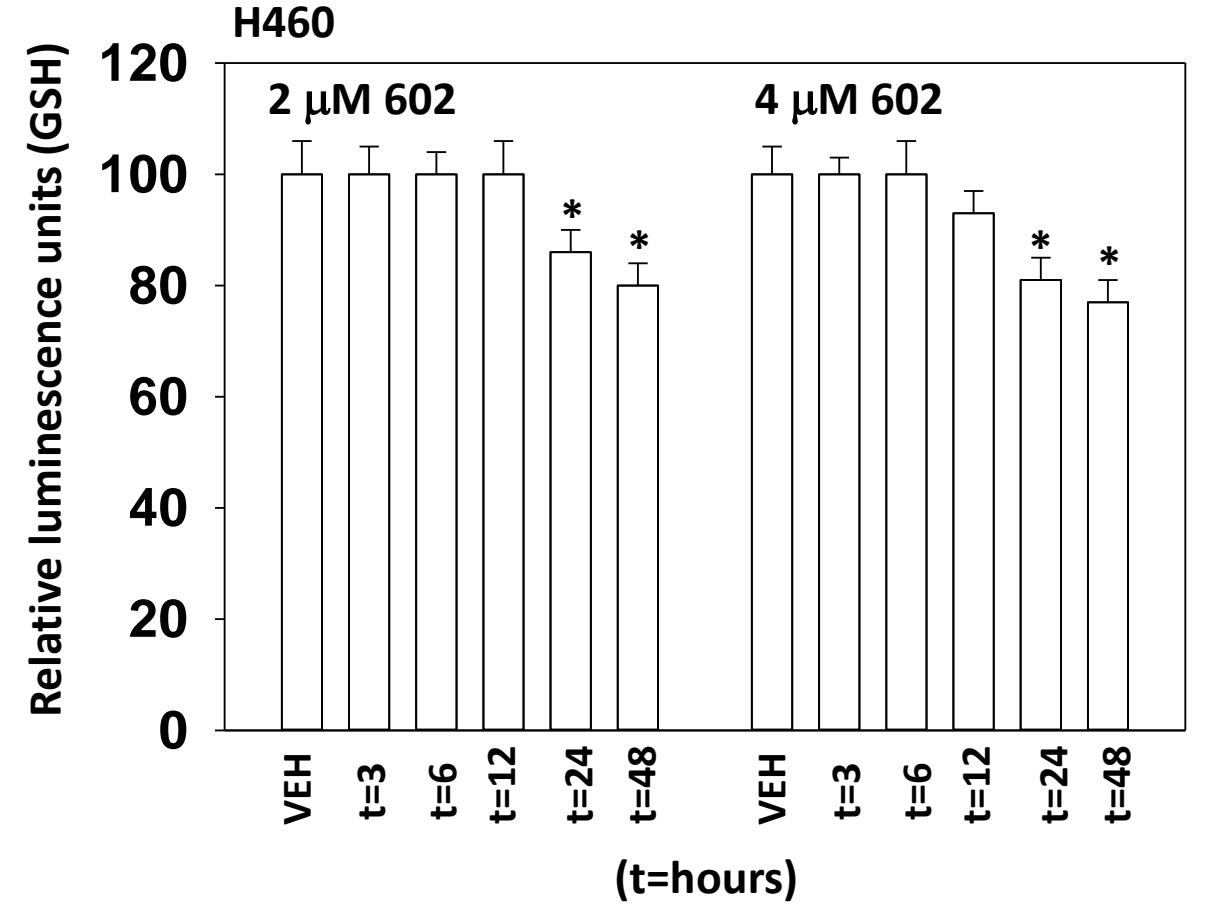

Supplemental Figure 5

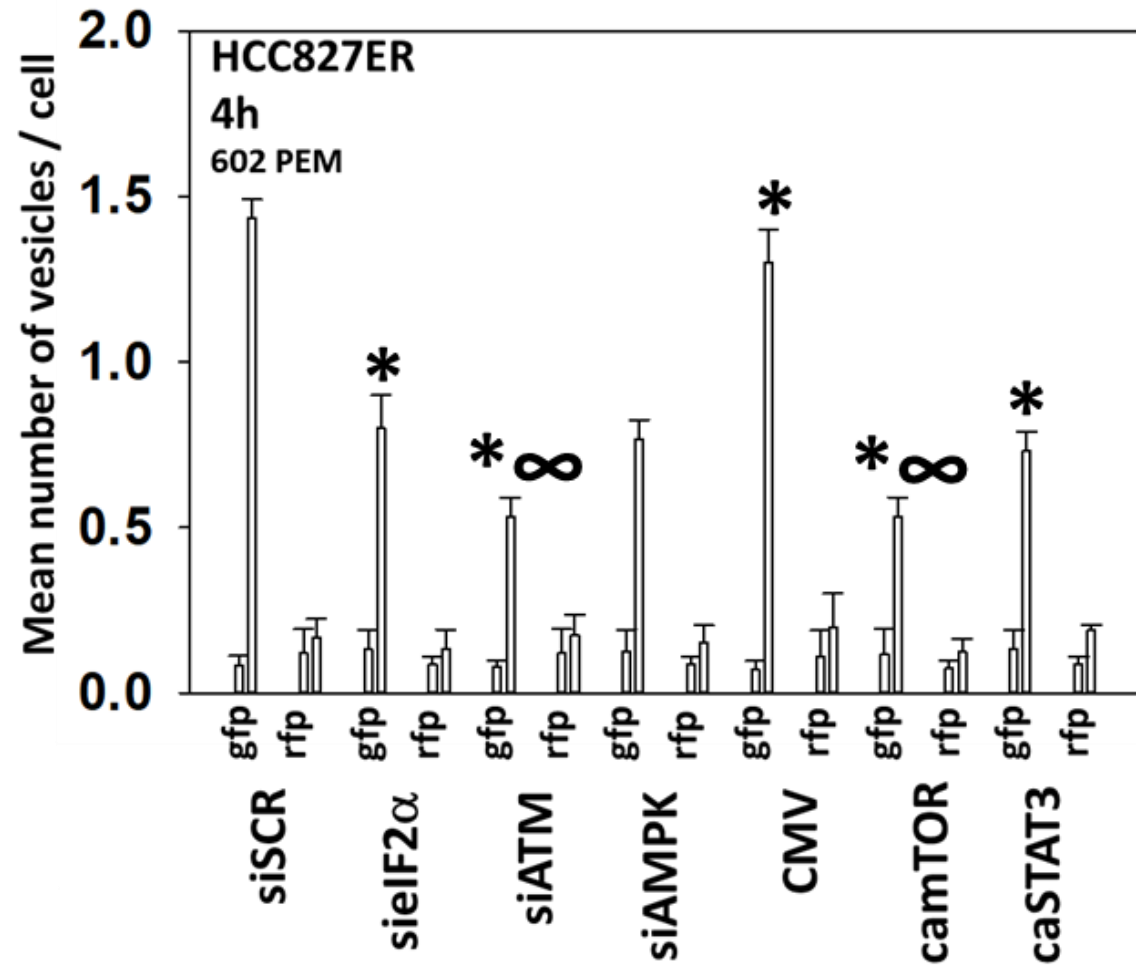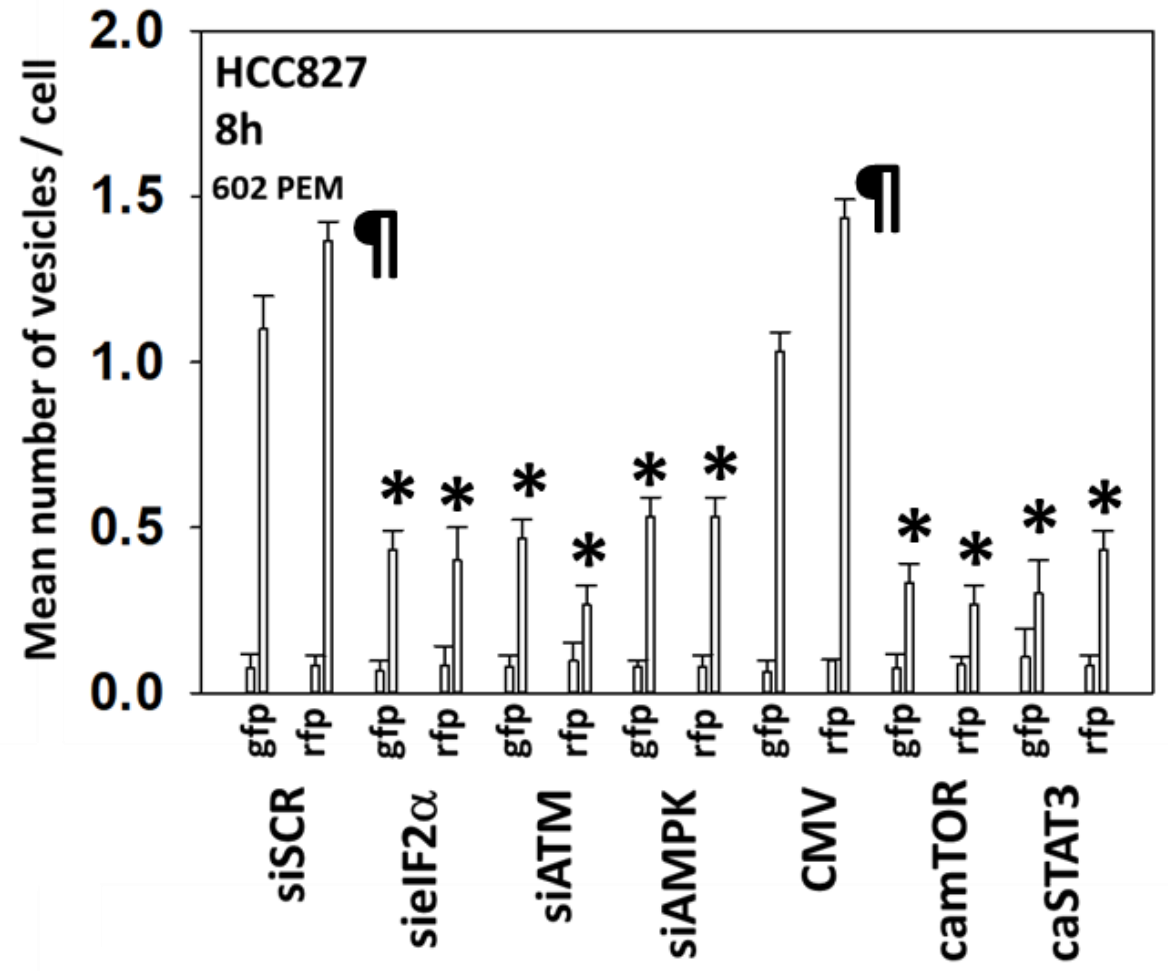

Supplement: DataSheet_1.pdf [file DataSheet_1.pdf]
